# Supplementary material for: Genome-wide comparative analysis of the BAHD superfamily in seven Rosaceae species and expression analysis in pear (Pyrus bretschneideri)
Source: PubMed Central journal article supplement (PMC6950883; doi:10.1186/s12870-019-2230-z), 2020-01-08

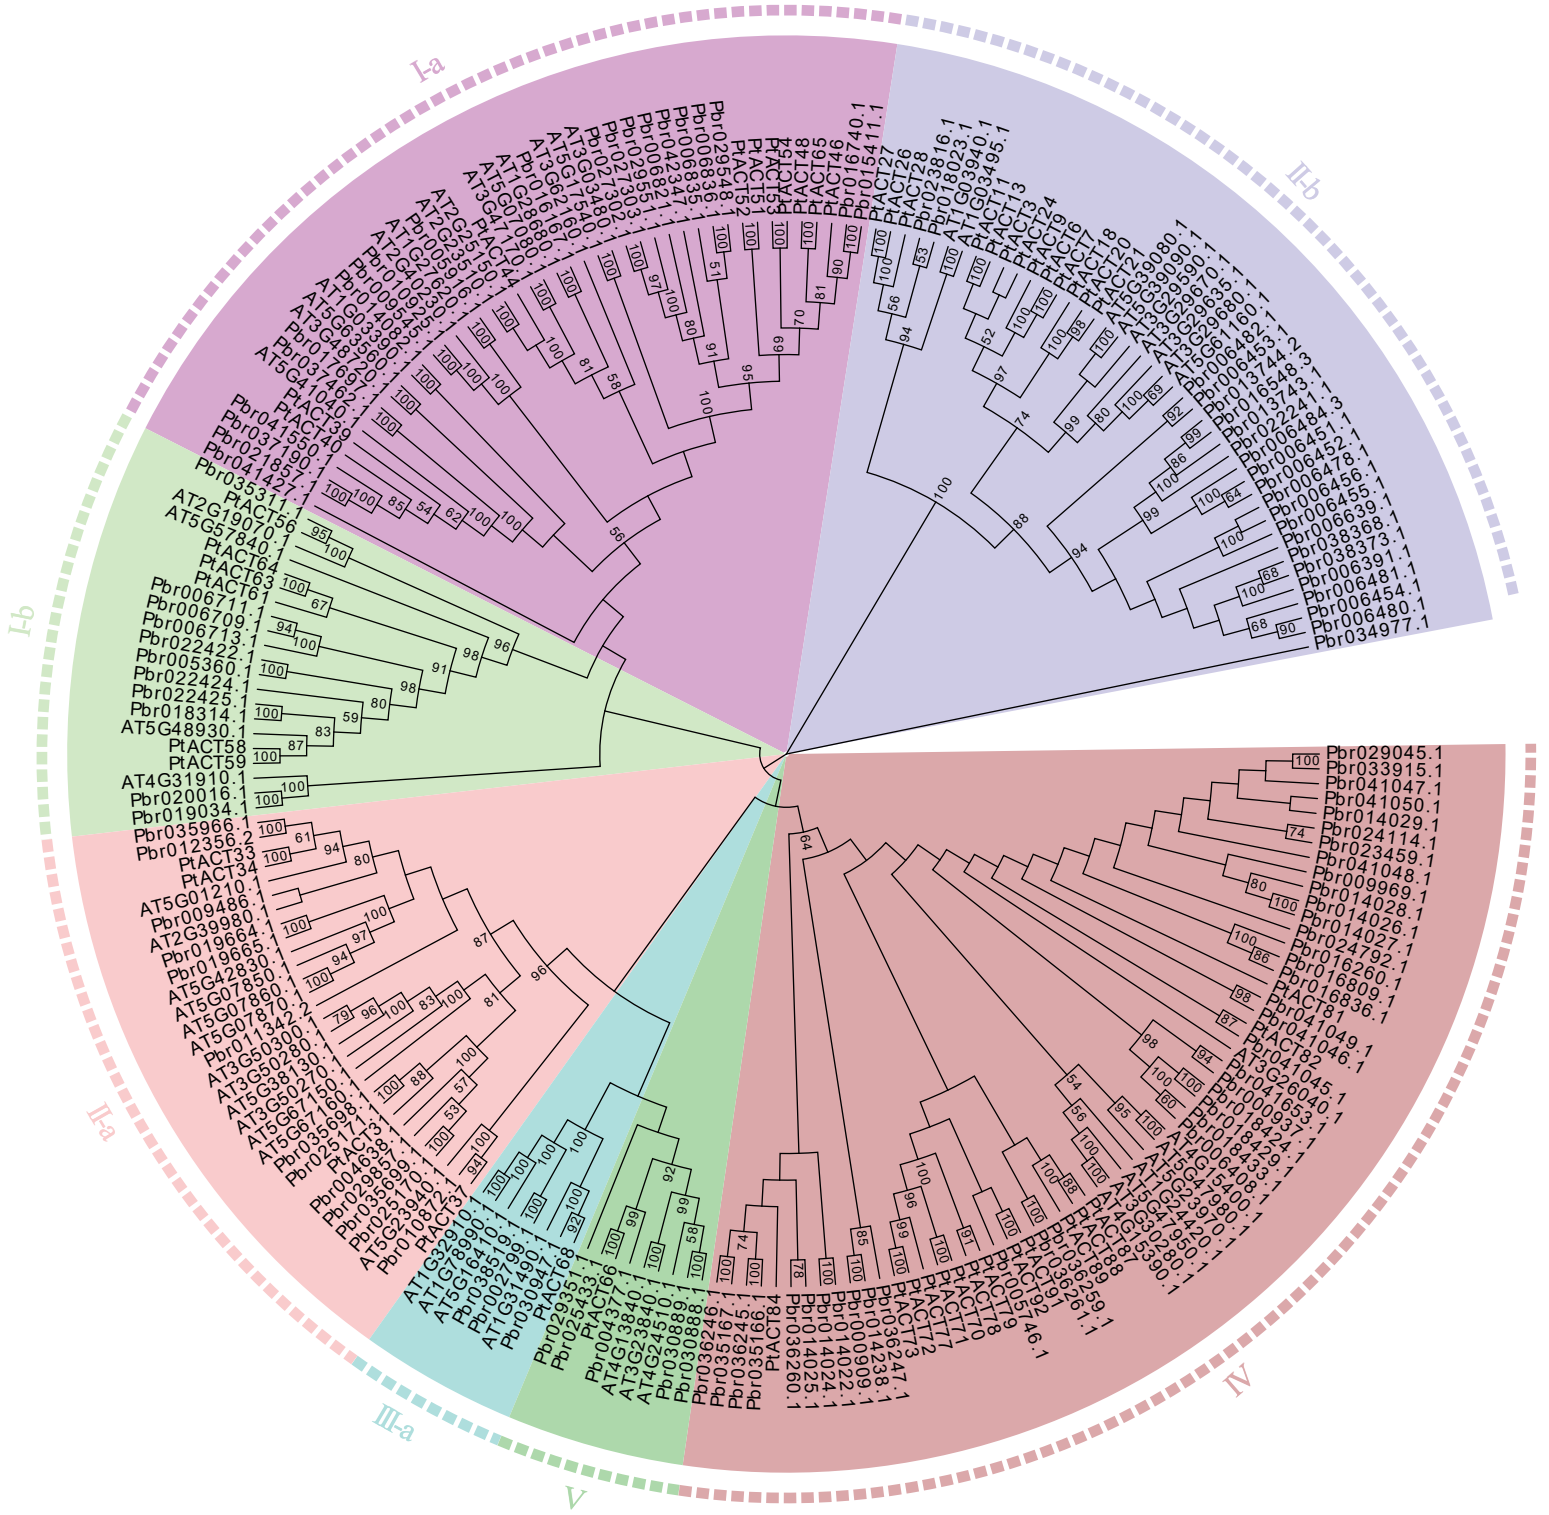

Supplement: 12870_2019_2230_MOESM2_ESM.pdf [file 12870_2019_2230_MOESM2_ESM.pdf]
